# Supplementary material
Source: PubMed Central journal article supplement (PMC3588867)
Supplement: supp_M030304_jlr.M030304-1.pdf [file supp_M030304_jlr.M030304-1.pdf]

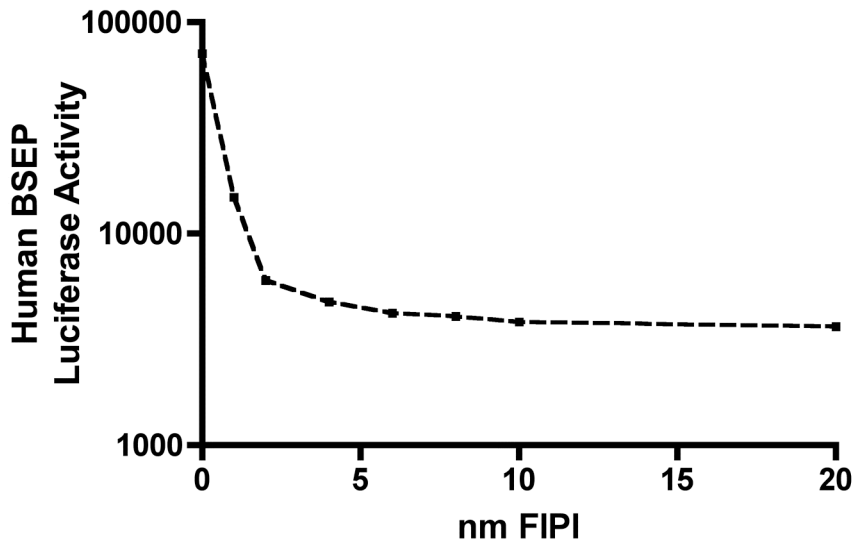

Supplemental Figure 1. Dose dependence of the effects of FIPI on FIC1 mediated activation of human BSEP promoter activity. Each point represents the mean of nine determinations and error bars represent the standard deviation of the measurements.
